# Supplementary material
Source: PubMed Central journal article supplement (PMC5962895)
Supplement: jgv-98-1316-s001.pdf [file jgv-98-1316-s001.pdf]

**Table S1: Sequence information of tested sgRNA**

| <b>Oligo name</b> | <b>Sequence (5' to 3')</b> |                                                                        |
|-------------------|----------------------------|------------------------------------------------------------------------|
| sgRictor-1        | Sense<br>Antisense         | CAC CGC CGA TCG CCG CCA TAT TGA<br>AAA CTC AAT ATG GCG GCG ATC GGC     |
| sgRictor-2        | Sense<br>Antisense         | CAC CGA TCT GAC CCG AGG TAA CGC G<br>AAA CCG CGT TAC CTC GGG TCA GAT C |
| sgRictor-3        | Sense<br>Antisense         | CAC CGA CAA GAC CTC CAG TTC CAG A<br>AAA CTC TGG AAC TGG AGG TCT TGT C |
| sgRictor-4        | Sense<br>Antisense         | CAC CGT AGC AGT GAT CCA AAA GGA<br>AAA CTC CTT TTG GAT CAC TGC TAC     |
| sgRictor-5        | Sense<br>Antisense         | CAC CGT CTT TCA GGT TTC ATC CCA G<br>AAA CCT GGG ATG AAA CCT GAA AGA C |
| sgRaptor-1        | Sense<br>Antisense         | CAC CGG TCC TGG CCT TCA GCC CCG<br>AAA CCG GGG CTG AAG GCC AGG ACC     |
| sgRaptor-2        | Sense<br>Antisense         | CAC CGC ATT TCG GAC TCC ATC AGT G<br>AAA CCA CTG ATG GAG TCC GAA ATG C |
| sgRaptor-3        | Sense<br>Antisense         | CAC CGG GAA ACT ACC AAG TTC AAG<br>AAA CCT TGA ACT TGG TAG TTT CCC     |

**Table S2: Sequence information of primers used for IFN PCR detection.**

| <b>Primer name</b>  | <b>Sequence (5' to 3')</b> |                                                                    | <b>Product size (bp)</b> |
|---------------------|----------------------------|--------------------------------------------------------------------|--------------------------|
| IFN- $\alpha$ 1     | Sense<br>Antisense         | GGC TCT GGT GCA TGA GAT GT<br>GCC TTC TTC CTG AAT CTG TCT TA       | 337                      |
| IFN- $\alpha$ 5/6   | Sense<br>Antisense         | GCA CAA ATG AGG AGA ATA TCT<br>CCT CCT GAG TCT GTC TTG             | 437                      |
| IFN- $\alpha$ 7/11  | Sense<br>Antisense         | GGG ACT TTG GAT CCC CTC AT<br>GTG GAG GAA GAG AAG GAT G            | 369                      |
| IFN- $\alpha$ 9     | Sense<br>Antisense         | GTG CTG CTC AGC TGC AAG<br>AGT CCT CCT CCA GCA GGG GC              | 384                      |
| IFN- $\alpha$ 12    | Sense<br>Antisense         | CCT CAG CCT TCC TCA CGG T<br>CTC ATG ACT TCT GCC CTG AT            | 509                      |
| IFN- $\alpha\omega$ | Sense<br>Antisense         | AGA TCT TCC GCC TCT TCA GCA CAA<br>TTC TGG TTT CCA CCC TGA CAA CCT | 261                      |
| IFN- $\beta$        | Sense<br>Antisense         | ATG TCA GAA GCT CCT GGG ACA GTT<br>AGG TCA TCC ATC TGC CCA TCA AGT | 246                      |
| IFN- $\delta$ 1     | Sense<br>Antisense         | TAT AAG CTT CTG GCA GGA GT<br>AGC CTT GAG TCA TCT TGT              | 205                      |
| IFN- $\delta$ 3/4/5 | Sense<br>Antisense         | AGA ACT TGT CTG CTG TCC ATT<br>TTT GGA GAA GAC ACC GGA             | 209                      |
| IFN- $\delta$ 6/7   | Sense<br>Antisense         | CAA TGG CCC ACA TCC ATT TGC T<br>AGA TGT GTC ACA AGT GTG CCT       | 214                      |

|                   |                    |                                                                    |     |
|-------------------|--------------------|--------------------------------------------------------------------|-----|
| IFN- $\delta$ 8/9 | Sense<br>Antisense | ATG CTC TGC TCC ACT CCT GC<br>GTG CCT TGA GTC ATC TGG ATT GG       | 194 |
| IFN- $\epsilon$   | Sense<br>Antisense | TTG GTA CTG CTG GCT TCT TCC ACT<br>AAC TGC CCT GAA GAG GCT GAA GAT | 255 |
| IFN- $\kappa$     | Sense<br>Antisense | GCA GAA TGA GCC ATT CGT TTC CCA<br>TCC TCT TCC TCC TGC AAG CAT TGT | 259 |
| IFN- $\omega$ 1   | Sense<br>Antisense | TGG TGC TTC TGC GTC AGA TG<br>CTC ACC TGC ACC AAG CAG GAC          | 265 |
| IFN- $\omega$ 2   | Sense<br>Antisense | TTC GTG CTC TCT CTA CCG ATG<br>CAG AGA TGG CCT GGA CCT             | 225 |
| IFN- $\omega$ 4   | Sense<br>Antisense | TCT GCA TCA GAT GAG GAG AC<br>CAA ATG TCT GCT CTT CCA TCT          | 278 |
| IFN- $\omega$ 5   | Sense<br>Antisense | TCA TGC TCT CTC TAC TGA CAG C<br>TGG AGC TTG TCC AGG AGG A         | 300 |
| IFNAR1            | Sense<br>Antisense | ACC ACA GTG AAA CAT CAC CTG CCT<br>TGT TGA TGA CGG GAG GAA ACA GGA | 349 |
| IFNAR2            | Sense<br>Antisense | TCA ACG GGA ATC AGA GTC GTC AGA<br>TCA GGA AAT ACC CAG GCG GAC AAT | 180 |
| $\beta$ -Actin    | Sense<br>Antisense | TCG CCG ACA GGA TGC AGA AGG A<br>AGG TGG ACA GCG AGG CCA GGA T     | 129 |

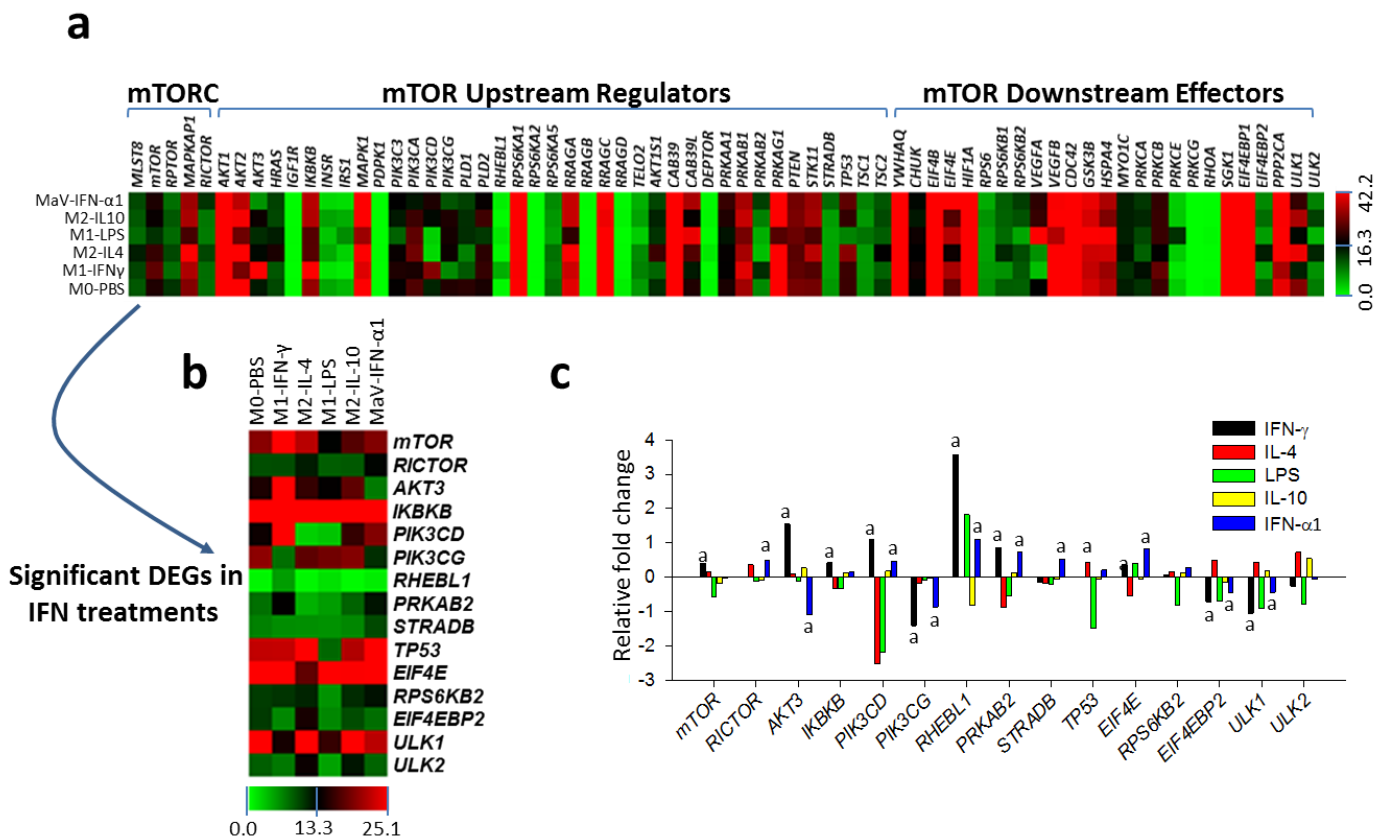

**Figure S1.** RNA-Seq analysis of DEGs in PRRSV-infected porcine alveolar MΦs at different activation statuses. The whole dataset of the RNA-Seq analysis is published in Sang et al. (2014). (a) Subsets of genes involved in the mTOR signaling pathway were extracted and displayed using a heatmap to show relative gene expression normalized as reads per kilobase of transcript per million reads mapped (RPKM). Some DEGs, which were significantly regulated in cytokine treatments compared with the control, served as candidate genes for regulation of antiviral response, and were further emphasized using a heatmap (RPKM) (b) and a bar chart (log of fold changes to the control) at the bottom (c). <sup>a</sup>*p* (FDR, false discovery rate) < 0.001 to the control of PBS. All gene symbols are from NCBI Gene database (<http://www.ncbi.nlm.nih.gov/gene/>).

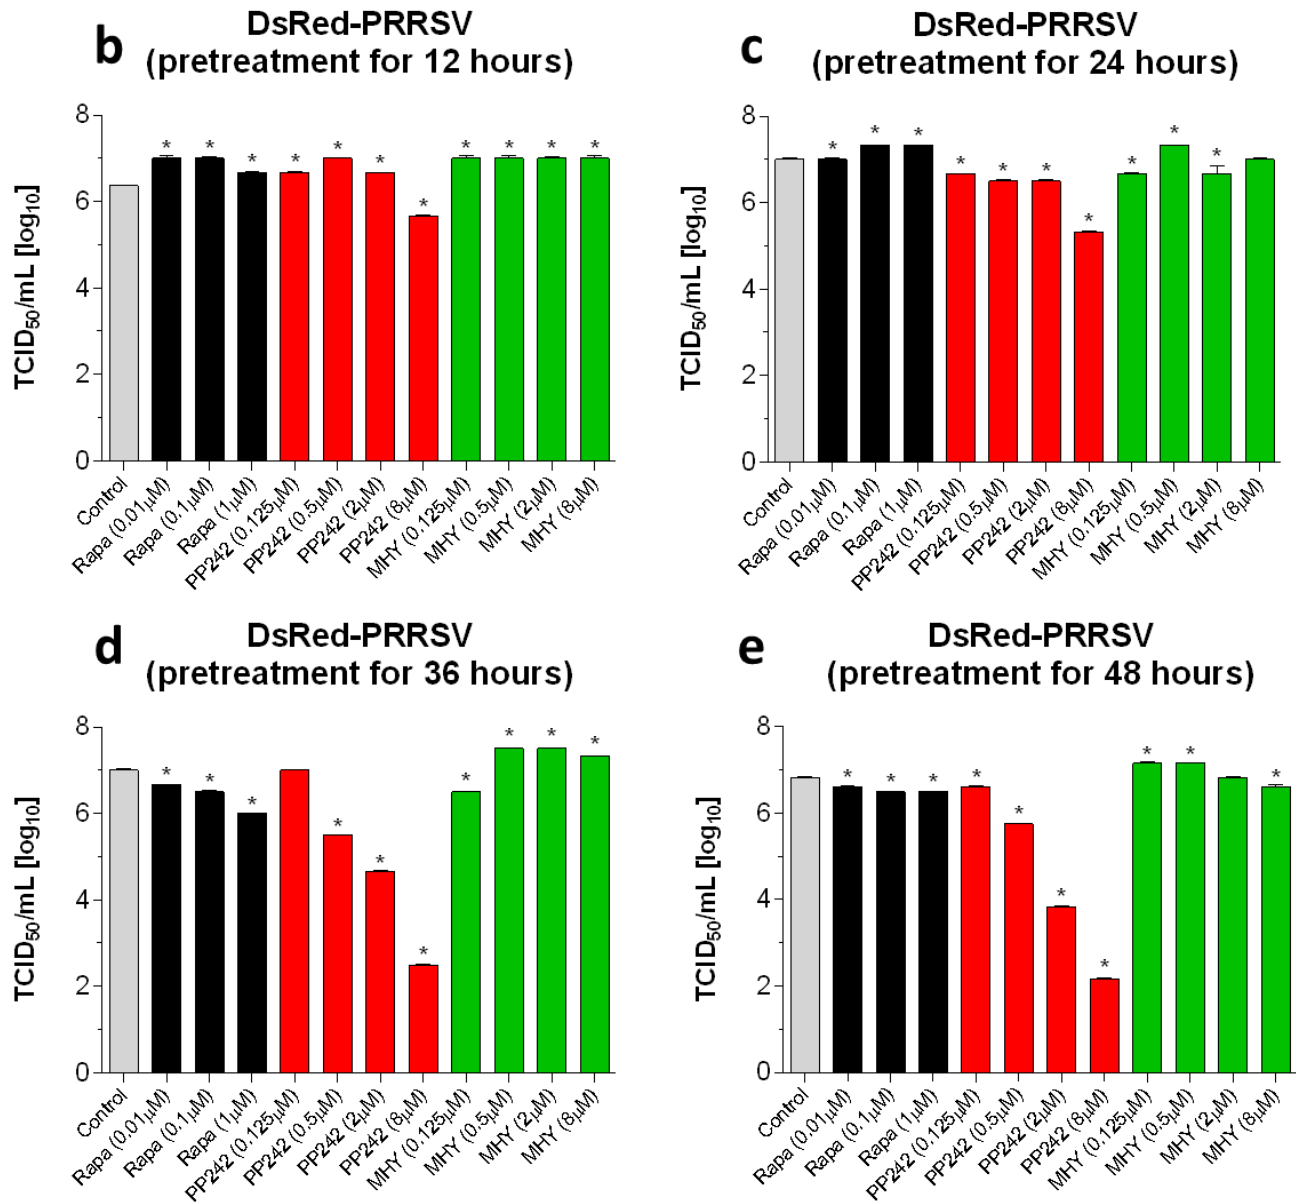

**Figure S2.** Titration of PRRSV stocks collected corresponding to Fig. 1b-1e. Equal volume (5  $\mu$ L) of culture supernatants collected from cells treated and infected with PRRSV as in Fig. 1b-1e, was titrated in MARC-145 cell monolayer for 72 h. Viral cytopathic effect was examined using crystal violet staining, and the dye was extracted and quantified with a microplate reader at absorbance of 570 nm. Viral titers was then determined by Reed-Muench method to define the highest dilution that reduced the cell number by 50% (TCID<sub>50</sub>/ml). Data are n = 3, \* $p$ <0.05 to the control.
